# Supplementary material
Source: PubMed Central journal article supplement (PMC6131007)
Supplement: NIHMS986099-supplement-1.pdf [file NIHMS986099-supplement-1.pdf]

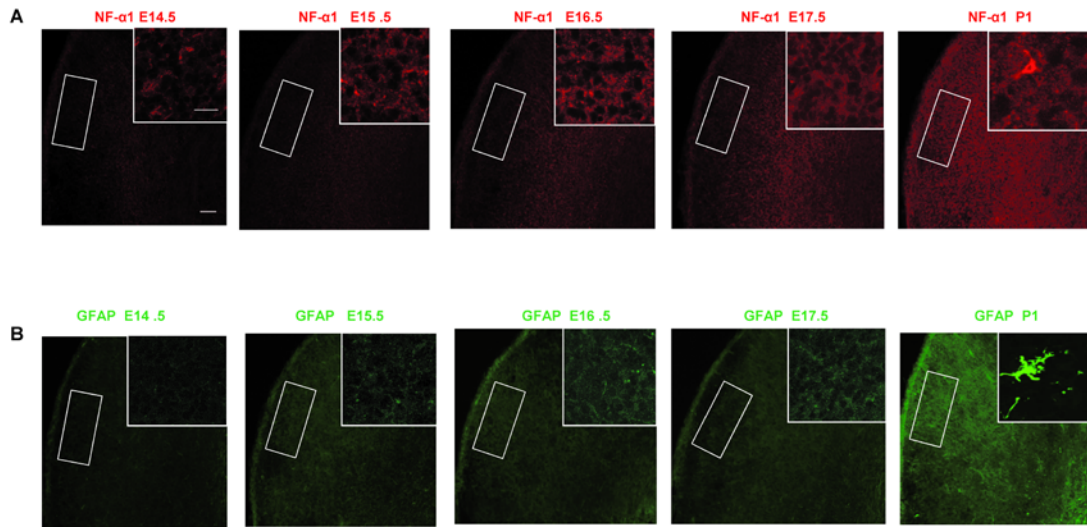

**Supplementary Figure Legends**

**Figure S1: Immunostaining of NF- $\alpha$ 1 and GFAP in the neocortex of mice at E14.5, E15.5, E16.5, E17.5 and P1.** Coronal sections (16 $\mu$ m) from E14.5, E15.5, E16.5, E17.5 and P1 mouse brains (8 random areas/section, 4 sections/embryo, N=3 embryo/phenotype) were immunostained for NF- $\alpha$ 1(red) (A) and GFAP (green) (B). The rectangular box in the immunostained sections represents the area of the neocortex used to measure and quantify the intensity of NF- $\alpha$ 1 and GFAP immunostaining. Low magnification ( $\times$ 10) and high magnification ( $\times$ 60, see insert) with oil immersion lens (Zeiss LSM 510 Inverted Meta) images were used to show immunostained cell pictures. Magnification ( $\times$ 20) images were used for quantification of intensity. Scale bar=100 $\mu$ m for ( $\times$ 10) and scale bar= 20  $\mu$ m for ( $\times$ 60). Expression of NF- $\alpha$ 1 from immunostained sections showed a gradual increase in intensity from E14.5 to P1(A), while GFAP immunoreactivity showed low intensity from E14.5 -E17.5 and a surge at P1(B). See Fig 7D and E for bar graphs showing intensity quantification.\*p<0.05 and \*\*p<0.01, N=3.

## **Supplementary Information:**

### **Supplementary Materials and Methods**

#### **Western Blot**

Cell lysates were prepared from E14.5, E15.5, E16.5, E17.5, P1 cortex as described previously [34]. Twenty  $\mu\text{g}$  of protein from the supernatants were analyzed by standard western blotting procedures using nitrocellulose. Protein bands were visualized and quantified by the Odyssey infrared imaging system and software v2.1 (LI-COR Inc.). The protein expression level for each sample was normalized to  $\beta$ -actin.

#### **Immunohistochemistry (IHC)**

For immunohistochemistry of E14.5, E15.5, E16.5, E17.5 and P1 mouse brains, pups were sacrificed by decapitation and processed as described previously [74]. The sections were processed also as described previously [74] and incubated with primary antibodies. Slides were examined using a fluorescence microscope (Nikon Eclipse 80i, Tokyo, Japan). The cortical layer was examined for astrocyte (GFAP) and NF- $\alpha$ 1 immunostaining. The intensity of the GFAP and NF- $\alpha$ 1 immunostaining within rectangular boxed fields (8 random areas/section, 4 sections/embryo, N=3 embryo/phenotype) in each section representing the whole neocortex was analyzed and quantified using imageJ software. Low magnification ( $\times 10$ ) and high magnification ( $\times 60$ ) with oil immersion lens (Zeiss LSM 510 Inverted Meta) images were used to show immunostained cell pictures and 20x magnification images were used for quantification of intensity.

| Immunoblotting                                                      |                                                                                                                                  |
|---------------------------------------------------------------------|----------------------------------------------------------------------------------------------------------------------------------|
| Primary antibodies                                                  | Secondary antibodies                                                                                                             |
| Goat anti-hCPE antibodies (1:5000)<br>(R&D systems)                 | Anti-mouse, anti-goat and anti-rabbit secondary antibodies conjugated to Fluor@700 or 800 (Donkey IgG, 1:10000)<br><br>(Bio-rad) |
| Rabbit anti-GFAP antibodies (1:5000)<br>(abcam)                     |                                                                                                                                  |
| Mouse Anti- $\beta$ -actin antibodies (1:10000)<br>(BD Bio-science) |                                                                                                                                  |
| Immunohistochemistry (IHC)                                          |                                                                                                                                  |
| Primary antibodies                                                  | Secondary antibodies                                                                                                             |
| Rabbit anti-GFAP antibodies (1:2000)<br>(abcam)                     | Alexa Fluor@488 anti-rabbit<br><br>(Donkey IgG, 1:2000)<br><br>(Invitrogen)                                                      |
| Goat anti-hCPE antibodies (1:2000)<br>(R&D systems)                 | Alexa Fluor@555 anti-goat<br><br>(Donkey IgG, 1:2000)<br><br>(Invitrogen)                                                        |

## Supplementary Figure Legend

**Figure S1: Immunostaining of NF- $\alpha$ 1 and GFAP in the neocortex of mice at E14.5, E15.5, E16.5, E17.5 and P1.** Coronal sections (16 $\mu$ m) from E14.5, E15.5, E16.5, E17.5 and P1 mouse brains (8 random areas/section, 4 sections/embryo, N=3 embryo/phenotype) were immunostained for NF- $\alpha$ 1 (red) (A) and GFAP (green) (B). The rectangular box in the immunostained sections represents the area of the neocortex used to measure and quantify the intensity of NF- $\alpha$ 1 and GFAP immunostaining. Low magnification ( $\times$ 10) and high magnification ( $\times$ 60, see insert) with oil immersion lens (Zeiss LSM 510 Inverted Meta) images were used to show immunostained cell pictures. Magnification ( $\times$ 20) images were used for quantification of intensity. Scale bar=100 $\mu$ m for ( $\times$ 10) and scale bar= 20  $\mu$ m for ( $\times$ 60). Expression of NF- $\alpha$ 1 from immunostained sections showed a gradual increase in intensity from E14.5 to P1(A), while GFAP immunoreactivity showed low intensity from E14.5 -E17.5 and a surge at P1(B). See Fig 7D and E for bar graphs showing intensity quantification. \* $p$ <0.05 and \*\* $p$ <0.01, N=3.

## Supplemental Table S1

### The sequences of primers for quantitative real-time PCR

|                                  |                             |
|----------------------------------|-----------------------------|
| mouse CPE/NF- $\alpha$ 1 forward | 5'-CTCATCAGCTACCTGGAGCA-3'  |
| mouse CPE/NF- $\alpha$ 1 reverse | 5'-AGCAAGCAATCGCCAGTAAT-3'  |
| mouse 18S forward                | 5'-CTCTTAGCTGAGTGTCCCGC-3'  |
| mouse 18S reverse                | 5'-CTGATCGTCTTCGAACCTCC-3'  |
| mouse Sox9 forward               | 5'-CATCACCCGCTCGCAATAC-3'   |
| mouse Sox9 reverse               | 5'-CCGGCTGCGTGACTGTAGTA-3'  |
| mouse Gfap forward               | 5'-ACATCGAGATCGCCACCTAC-3'  |
| mouse Gfap reverse               | 5'-TGCTTCGACTCCTTAATGACC-3' |

## Supplemental Table S2

### Primary Antibodies

#### Immunoblotting

| Antibodies                                            | Conditions            |
|-------------------------------------------------------|-----------------------|
| anti-ERK(Cell Signaling)                              | mouse (1:1000)        |
| anti-p-ERK(Cell Signaling)                            | rabbit (1:5000)       |
| anti- $\beta$ -Catenin (Santa Cruz)                   | mouse (1:500)         |
| anti-alpha-tubulin(Cell Signaling)                    | rabbit IgG1, (1:5000) |
| anti-Sox9 (Abcam)                                     | rabbit IgG, (1:5000)  |
| anti-CPE antibodies (BD Bio-science)                  | mouse (1:2500)        |
| anti- $\beta$ -actin (BD Bio-science)                 | mouse (1:10000)       |
| anti-CPE/NF- $\alpha$ 1 (generated in our laboratory) | rabbit (1:250)        |
| anti-hCPE antibodies(R&D systems)                     | Goat(1:5000)          |
| anti-GFAP antibodies(abcam)                           | Rabbit(1:5000)        |

## Immunocytochemistry/Immunohistochemistry

| Antibodies                            | Conditions           |
|---------------------------------------|----------------------|
| anti-Nestin (Millipore)               | mouse IgG1, (1:3000) |
| anti-GFAP (Abcam)                     | rabbit IgG, (1:2000) |
| anti-CNPase (Abcam)                   | mouse IgG1, (1:3000) |
| anti- $\beta$ III tubulin (Millipore) | mouse IgG1, (1:3000) |
| anti-MAP2 antibodies (Millipore)      | mouse (1:2000)       |
| anti-hCPE antibodies(R&D systems)     | Goat(1:2000)         |

## Secondary antibodies

### Immunoblotting

| Antibodies (LI-COR – Odyssey)                                                                       | Conditions           |
|-----------------------------------------------------------------------------------------------------|----------------------|
| anti-mouse,anti-goat and anti-rabbit secondary antibodies conjugated to Fluor® 700 or 800 (Bio-rad) | donkey IgG, 1:10,000 |

## Immunocytochemistry/Immunohistochemistry

| Antibodies (Life technologies)               | Conditions         |
|----------------------------------------------|--------------------|
| Alexa Fluor® 488 anti-mouse IgG              | donkey IgG, 1:2500 |
| Alexa Fluor® 594 anti-rabbit IgG             | donkey IgG, 1:2500 |
| Alexa Fluor® 488 anti-mouse IgG              | donkey IgG, 1:50   |
| Alexa Fluor® 594 anti-rabbit IgG             | donkey IgG, 1:50   |
| Alexa Fluor®488 anti-rabbit IgG (Invitrogen) | donkey IgG, 1:2000 |
| Alexa Fluor®555 anti-goat IgG (Invitrogen)   | donkey IgG, 1:2000 |
